# Supplementary material
Source: Springer Nature journal article supplement (https://www.springermedizin.de/resource/supplementary/12903_2013_398_MOESM5_ESM.pdf/9516950)

$\Delta$  PAR score

40,00  
30,00  
20,00  
10,00  
,00  
-10,00

NSHCNs

SHCNs

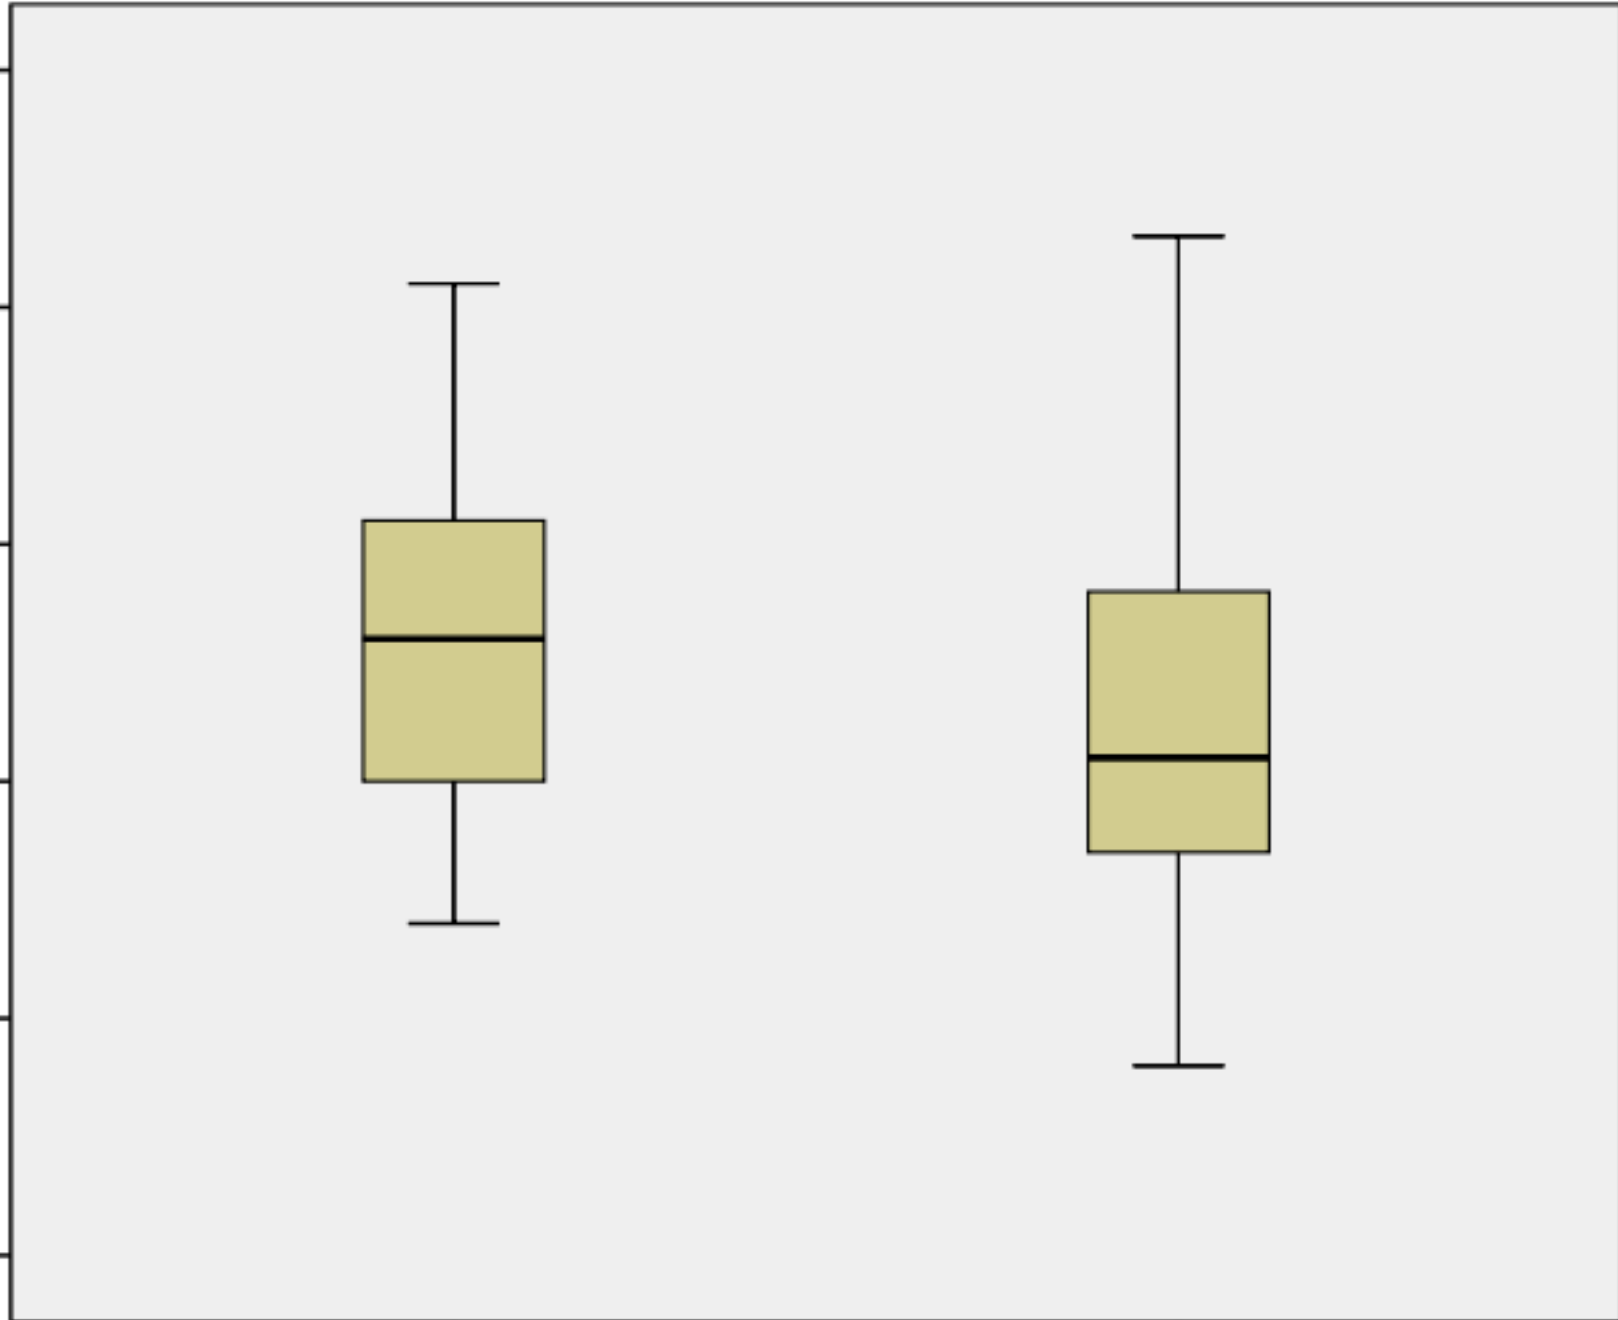

Supplement: MOESM5 [file 9516950]
